# Supplementary material for: Increasing Earthquake Awareness: Seismo-at-school Switzerland
Source: Copernicus journal article supplement (doi:10.5194/egusphere-2025-5726), 2026-01-05
Supplement: Supplementary file 1 [file egusphere-2025-5726-supplement.pdf]

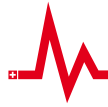

Schweizerischer Erdbebendienst  
Service Sismologique Suisse  
Servizio Sismico Svizzero  
Swiss Seismological Service

**ETH**

Eidgenössische Technische Hochschule Zürich  
Swiss Federal Institute of Technology Zurich

# seismo@school survey

## Evaluation

### Getting started

Dear seismo@school teachers

We would like to thank you very much for participating in the seismo@school initiative. It is only thanks to your commitment that we are able to pass on knowledge about earthquakes directly to students. In doing so, you are making a significant contribution—among many other things—to strengthening risk culture and raising awareness of hazards. In this way, you are helping to build a more resilient and safer community.

Seismo@school was funded as part of an AGORA project financed by the Swiss National Science Foundation. This initiative will come to an end in August 2025. For the final report, we now need to outline what we have achieved with seismo@school. Even though the funding is coming to an end, we are keen to continue the initiative—and we hope that you are motivated to do so too!

Your feedback is essential for our final report. If possible, the results will also be published in a scientific article.

Please take a few minutes to complete the survey by September 12, 2025. It takes about 15 minutes and is anonymous – unless you voluntarily provide your contact details at the end.

### General information about the project

The first questions relate to the general objectives and your participation in the seismo@school initiative.

#### 1. How much do you agree with the following statements about seismo@school?

(1 = strongly disagree to 5 = strongly agree | don't know)

- The project has given me ideas on how to teach complex scientific content in a way that is easy to understand.
- The Raspberry Shake, the teaching materials, and the information obtained from the workshops made it possible to teach the topic of earthquakes in a more appealing and practical way.
- The programme made it easier for my students to access scientific questions and methods.
- The seismo@school programme has helped to raise awareness of earthquake risk among myself and my students.

#### 2. Was your overall experience of participating in the seismo@school initiative positive?

- Yes, very
- Partly
- No, not really

#### 3. Further comments on the initiative in general:

- Open comment box

18.11.2025

**Commented [LK1]:** For the overall project, we will measure the impact of the collaboration between all involved partners by conducting a survey in the middle and at the end of the project assessing the efficiency of co-creating knowledge and expertise. This is key because one overarching goal of the project is to build a nationwide seismo@school  
22 <https://focusterra.ethz.ch/en/>  
[19.09.2022]  
12  
platform. Further, since the outputs of the three tasks are different, we will evaluate the impacts separately by qualitative (e.g., questionnaires) and quantitative methods (e.g., access statistics). For Task I, we will assess the amount of content that was revised and updated on the SED website and partners' platforms, the number of visitors, accesses and downloads of the materials. This will also be done for Task II, where we will additionally assess how many teachers have already integrated or plan to integrate the exploratory activities and how focusTerra is using them. For Task III, the promotion workshop is key to assess how many German-speaking schools are interested. We will further assess how many schools have installed operational sensors by the end of the project. These assessments will be compiled in a final evaluation report and published in a scientific paper if possible.

## Scope of the project

We would like to use the following questions to determine how many people we reached through seismo@school.

### 4. Approximately how many students have you used the Raspberry Shake with in class? (If not yet used: 0)

- Open comment box

### 5. Have you discussed the seismo@school project with teachers of other subjects?

- Yes, regularly
- Yes, occasionally
- No, not yet
- Not possible (e.g., no interdisciplinary collaboration)
- Other: \_\_\_\_\_

Commented [LK2]: Here I would also add an open text field

### 6. Have you also mentioned seismo@school outside of school, e.g., with parents or at public events? (Multiple answers possible)

- Yes, occasionally in conversations with parents
- Yes, during school or parents' evening
- Yes, in a public context (e.g., event, newsletter, or news article on the school website)
- No
- Other:

### 7. Further comments on the scope of the project

- Open comment box

## Raspberry Shake in the classroom

This section deals with questions about the Raspberry Shake seismometer and its use in school lessons.

### 8. Please rate the following statements:

(1 = does not apply at all to 5 = applies completely)

- I have used the Raspberry Shake with the class to analyze real earthquake data (local or global).
- The Raspberry Shake helps to make the topic of earthquakes more tangible.
- The Raspberry Shake is suitable for motivating students to carry out their own projects (e.g., final year projects).
- The technical handling of the Raspberry Shake is straightforward.
- The Raspberry Shake can be used effectively in classroom teaching.

### 9. How have you used the Raspberry Shake in class so far?

- Open comment box

### 10. Is there anything else you would like to say about the use or handling of the Raspberry Shake?

- Open comment box

## Homemade seismometer

As part of the project, you were able to obtain a construction kit for the "Homemade Seismometer."

**11. Did you order a construction kit for the "Homemade Seismometer"?**

- Yes
- No
- I didn't know about it

**12. How exciting do you find the use of this device in the classroom?**

1 = not exciting at all to 5 = very exciting

**13. Do you have any comments, questions, or suggestions for improvement regarding the "Homemade Seismometer" kit?**

- Open text box

## Teaching modules

In this section, we ask you questions about the teaching modules. These are published on the SED website: [www.seismo.ethz.ch/news-and-services/for-schools/teaching-resources/](http://www.seismo.ethz.ch/news-and-services/for-schools/teaching-resources/)

**14. Have you already looked at one or more of the seismo@school teaching modules?**

- Yes, several
- Yes, one
- No, not yet
- I didn't know there were teaching modules

Commented [LK3]: You could link the modules right away.

**15. Have you already used one or more modules in class—either in whole or in part?**

- Yes, in full
- Yes, partially (e.g., individual tasks or materials)
- Not yet, but planned
- No, not planned

**16. If you have already looked at the modules: What was your first impression?**

1 = very poor to 5 = very good

Reason for your rating (optional)

- Open text box

**17. Which elements of the teaching modules do you find particularly helpful?**

(Multiple answers possible)

- Technical explanations
- Suggestions for tasks and experiments
- Illustrations and explanatory graphics
- Listing of learning objectives
- Comprehensibility for students
- Other: \_\_\_\_\_

**18. Do you have any requests or suggestions for improvement regarding the modules?**

- Open comment box

---

## Interaction and support

Here we ask you a few questions about interaction, communication, and support over the last two years.

**19. Have you participated in one or more workshops organized by the seismo@school team?**

- Yes
- No
- I didn't know there were workshops

**20. If yes: How helpful were the workshops for you?**

(1 = not helpful at all to 5 = very helpful)

**21. How helpful were the information and updates on current earthquakes that we sent you by email?**

(1 = not at all helpful/unnecessary to 5 = very helpful)

**22. Did the project help you to network or exchange ideas with other geography teachers in Switzerland?**

- Yes, very
- A little
- No
- Not relevant to me

**23. Would you like to add anything else about collaboration or communication in the project?**

- Open comment box

---

## Contact

The survey is anonymous.

It is up to you whether you still want to leave your details here. This will allow us to contact you if we have any questions about your feedback.

- Name
- School
- Email

---

## Graduation

Done! Thank you for your feedback. We really appreciate you taking the time to provide it.

If you have any questions or other concerns, please feel free to contact us at [seismo\\_at\\_school@sed.ethz.ch](mailto:seismo_at_school@sed.ethz.ch).
